# Supplementary material for: Excellent degradation performance of 3D hierarchical nanoporous structures of copper towards organic pollutants
Source: Royal Society of Chemistry journal article supplement (doi:10.1039/c8ta07973k), 2018-01-01
Supplement: c8ta07973k1.pdf [file c8ta07973k1.pdf]

## Supplementary Information

# Excellent degradation performance towards organic pollutants of 3D hierarchical nanoporous structures of Copper

Chong Yang#, Cheng Zhang#, Lin Liu\*

*State Key Laboratory of Material Processing and Die & Mould Technology and  
School of Materials Science and Engineering, Huazhong University of Science and  
Technology, 430074 Wuhan, China*

**\*Corresponding author:** Tel.: +86 27 87556894; Fax: +86 27 87554405;

*E-mail address: lliu2000@mail.hust.edu.cn*

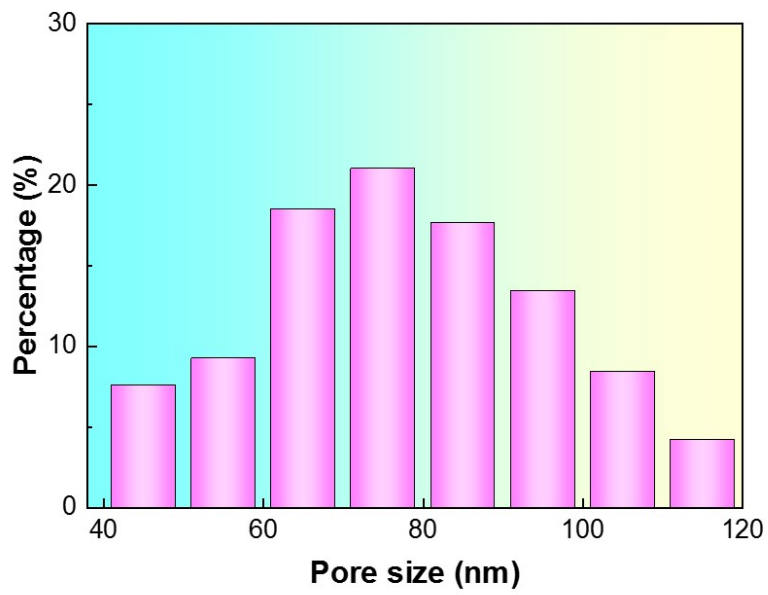

**Figure S1.** Nanopore size distribution in the 3D NP-Cu sample, as measured by SEM micrograph analysis using an ImagePro Plus software.

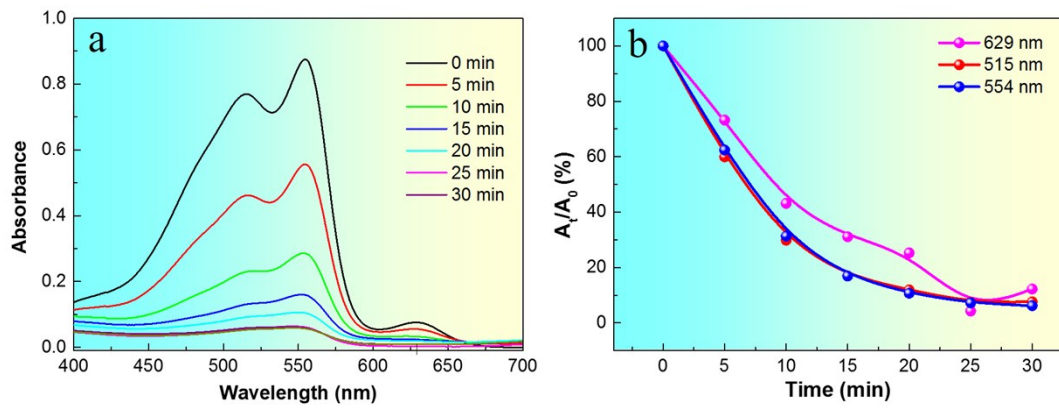

**Figure S2.** (a) UV absorption spectrum of the mixture of five dyes degraded using 3D NP-Cu within different time intervals; (b) degradation efficiency of the mixed dyes by using 3D NP-Cu.

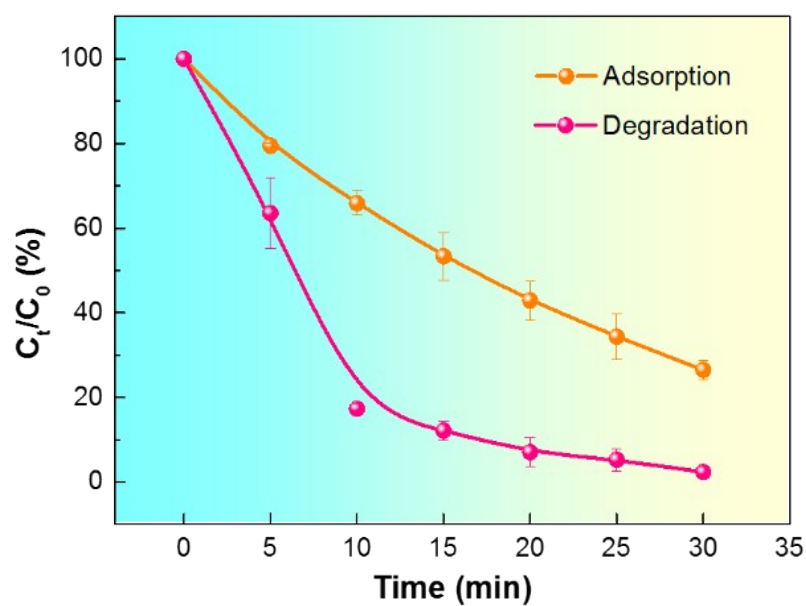

**Figure S3.** Comparison of degradation of MO (45 °C,  $[H_2O_2]=6$  mM, light intensity  $0.960$  mW/cm<sup>2</sup>) and adsorption of MO (45 °C,  $[H_2O_2]=0$  mM, Ar purge, in darkness).

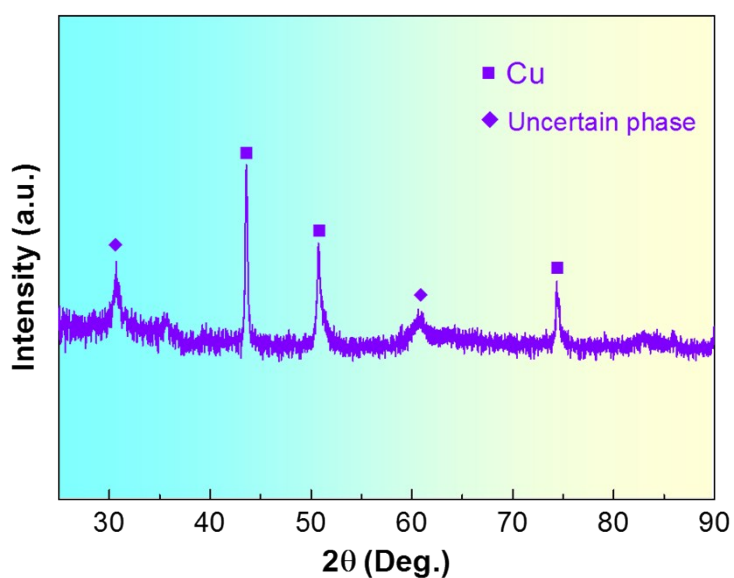

**Figure S4.** XRD pattern of the 3D NP-Cu sample after H<sub>2</sub> reduction. No peaks corresponding to Cu<sub>2</sub>O phase could be detected in the XRD pattern, indicating that the Cu<sub>2</sub>O was fully reduced to metal Cu after this treatment.

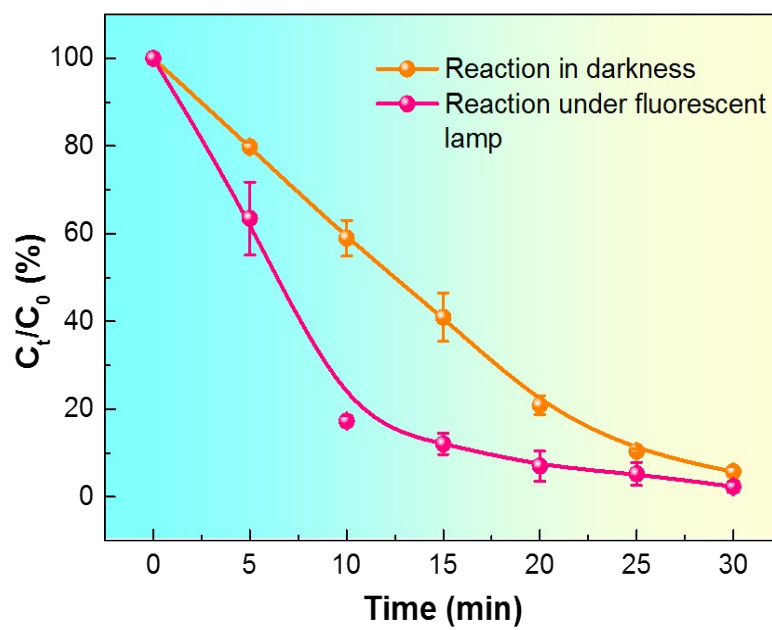

**Figure S5.** Comparison of degradation of MO solution under fluorescent lamp and darkness. Condition: pH=2,  $[H_2O_2]=6$  mM, Temp.=45 °C.
